# Supplementary material
Source: publisher figshare collection journal article supplement (https://future-science-group.figshare.com/ndownloader/files/27685332)
Supplement: Supplementary file [file 27685332]

## Challenges

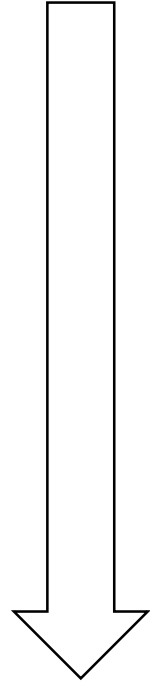

## Opportunities

- Lock-down
- Reduced HIV testing in outpatients clinics
- Reduced PEP and PrEP
- Stigma

- Lock-down
- Reduced personnel employed in HIV clinics
- Stigma

- Lock-down
- Difficulties in reaching the hospital/HIV clinics
- Difficulties in drug supply
- Stigma

**90%**

**Diagnosed**

**90%**

**On treatment**

**90%**

**Virally suppressed**

- Increasing information and health knowledge
- HIV self testing
- Screen also for hepatitis B and C, and TB
- Reduce double stigma

- Telehealth
- Reduce double stigma

- Simplify access to antiretroviral medications
- Reduce double stigma
